1 **Developmental timing of *Drosophila pachea* pupae is robust to temperature**  
2 **changes**

3

4 running title: Temperature and development in *D. pachea*

5

6 Bénédicte M. Lefèvre<sup>a,b\*</sup>, Stecy Mienanzambi<sup>a</sup> and Michael Lang<sup>a\*</sup>

8 <sup>a</sup>Team “Evolution and Genetics”, Institut Jacques Monod, CNRS, UMR7592, Université Paris Cité,  
9 15 rue Hélène Brion, 75013 Paris

10 <sup>b</sup>Current address: Team “Stem Cells and Tissue Homeostasis”, Institut Curie, CNRS, UMR3215,  
11 INSERM U934, PSL Research University, 26 rue d’Ulm, 75248 Paris Cedex 05

12

13 <sup>\*</sup>corresponding authors: Bénédicte M. Lefèvre, [benedictelefevre@gmail.com](mailto:benedictelefevre@gmail.com), and Michael Lang,  
14 [michael.lang@ijm.fr](mailto:michael.lang@ijm.fr)

15 **Co-authors details**

16 Bénédicte M. Lefèvre

17 Team “Evolution and Genetics”, Institut Jacques Monod, CNRS, UMR7592, Université Paris Cité, 15  
18 rue Hélène Brion, 75013 Paris; current address: Team “Stem Cells and Tissue Homeostasis”, Institut  
19 Curie, CNRS, UMR 3215, INSERM U934, PSL Research University, 26 rue d’Ulm, 75248 Paris  
20 Cedex 05; [benedictelefevre@gmail.com](mailto:benedictelefevre@gmail.com); ORCID ID: 0000-0002-1958-2886.

21

22 Stecy Mienanzambi

23 Team “Evolution and Genetics”, Institut Jacques Monod, CNRS, UMR 7592, Université Paris Cité,  
24 15 rue Hélène Brion, 75013 Paris; [stecy.mienanzambi@ijm.fr](mailto:stecy.mienanzambi@ijm.fr); ORCID ID: 0000-0003-1316-9713.

25

26 Michael Lang

27 Team “Evolution and Genetics”, Institut Jacques Monod, CNRS, UMR 7592, Université Paris Cité,  
28 15 rue Hélène Brion, 75013 Paris; [michael.lang@ijm.fr](mailto:michael.lang@ijm.fr); ORCID ID: 0000-0002-2297-5680.

29

30 **Author contributions**

31 BL and ML designed the experiments. BL and SM generated the data. BL analyzed the data,

32 BL and ML wrote the manuscript. All authors read and approved the final manuscript.

33

34 **Conflict of interest**

35 The authors have no conflict of interest to declare.

1

36 **Abstract**

37 Rearing temperature is correlated with the timing and speed of development in a  
38 wide range of poikilotherm animals that do not regulate their body temperature. However,  
39 exceptions exist, especially in species that live in environments with high temperature  
40 extremes or oscillations. *Drosophila pachea* is endemic to the Sonoran desert in Mexico, in  
41 which temperatures and temperature variations are extreme. We wondered if the  
42 developmental timing in *D. pachea* may be sensitive to differing rearing temperatures or if it  
43 remains constant. We determined the overall timing of the *Drosophila pachea* life-cycle at  
44 different temperatures. The duration of pupal development was similar at 25°C, 29°C and  
45 32°C, although the relative progress differed at particular stages. Thus, *D. pachea* may have  
46 evolved mechanisms to buffer temperature effects on developmental speed, potentially to  
47 ensure proper development and individual's fitness in desert climate conditions.

48

49 **Keywords**

50 *Drosophila pachea*, pupal development, temperature, heterochrony

## 51 1. Introduction

52 Poikilotherms animals do not regulate their body temperature contrary to  
53 homeotherms (Precht et al., 1973) and are sensitive to environmental temperature.  
54 Environmental temperature in turn affects their metabolism (Hazel and Prosser, 1974). In  
55 particular, it seems widespread that developmental speed increases with rearing  
56 temperature in poikilothermic species (Abril et al., 2010; Asano and Cassill, 2012; Hrs-  
57 Brenko et al., 1977; Ikemoto, 2005; Manoj Nair and Appukuttan, 2003; Nishizaki et al., 2015;  
58 Pechenik et al., 1990; Porter, 1988; Sharpe and DeMichele, 1977; Vélez and Epifanio,  
59 1981), including various *Drosophila* species (David and Clavel, 1966; James and Partridge,  
60 1995; Kuntz and Eisen, 2014; Powsner, 1935). This phenomenon is proposed to be due to  
61 thermodynamics of enzymes responsible for biochemical reactions underlying  
62 developmental processes (Crapse et al., 2021; Ikemoto, 2005; Schoolfield et al., 1981;  
63 Sharpe and DeMichele, 1977). Thermal-stress can accelerate development and has been  
64 shown to result in an increase of developmental instability (Kristensen et al., 2003; Nishizaki  
65 et al., 2015; Polak and Tomkins, 2013), measured as deviations of an individual's character  
66 from the average phenotype in the population under the same conditions (Palmer, 1994;  
67 Zakharov, 1992). This may result in a decreased individual's survival and reproductive  
68 fitness. In contrast, a slow development may potentially lead to an increased risk of  
69 predation at vulnerable stages, such as immobile pupae in holometabolous insects (Ballman  
70 et al., 2017; Borne et al., 2021; Hennessey, 1997; Thomas, 1993; Urbaneja et al., 2006).  
71 Furthermore, a variable timing of development among individuals of a same species might  
72 induce intraspecific competition (Amarasekare and Coutinho, 2014; Frogner, 1980) as  
73 individuals developing faster may reproduce sooner and for a longer period compared to  
74 those developing more slowly. Different mechanisms have been found to regulate  
75 developmental timing. The so-called heterochronic miRNAs, such as *let-7* and *miR-125*,  
76 were originally discovered in *Caenorhabditis elegans* (Rhabditida: Rhabditidae)(Ambros,  
77 2011; Ambros and Horvitz, 1984). These miRNAs are conserved in a wide range of species,  
78 such as *Drosophila melanogaster* (Diptera : Drosophilidae)(Caygill and Johnston, 2008) or  
79 *Danio rerio* (Cypriniformes: Cyprinidae)(Ouchi et al., 2014), as well as in mammals and  
80 plants (Ambros, 2011). They act at post-transcriptional level to regulate cellular mRNA  
81 levels, and have been found to control the developmental timing, cell fate and cell  
82 differentiation. Hormones are also known to be important regulators of developmental timing.  
83 In *D. melanogaster*, each of the developmental transitions are regulated by ecdysone  
84 pulses, and premature transition from larva to pupa with respect to food conditions or  
85 starvation is prevented by juvenile hormone (Riddiford, 1994; Riddiford and Ashburner,  
86 1991). Thus, developmental timing might be regulated to reach an optimal duration with

87 respect to outer environmental factors.

88 More than 1500 described species of the genus *Drosophila* (Bächli et al., 2021;  
89 O'Grady and DeSalle, 2018) occupy a wide range of habitats with various climatic conditions  
90 (Markow and O'Grady, 2008). A dozen of species have been reported to be cosmopolitan  
91 species (Markow and O'Grady, 2008, 2005), such as *Drosophila melanogaster* (David and  
92 Cappy, 1988; Li and Stephan, 2006) that potentially dispersed with humans from Africa  
93 around the globe (Mansourian et al., 2018). These species may be generalists but were also  
94 found to be locally adapted to diverse environments (Kapun et al., 2020; Markow and  
95 O'Grady, 2008). In contrast, the vast majority of species are restricted to certain continental  
96 ranges or are endemic to a specific geographic region that encompasses a unique habitat  
97 with specific food and climate conditions (Markow and O'Grady, 2008, 2005). Because of  
98 their inability to disperse outside their habitat, these endemic species may have evolved  
99 temperature-buffering mechanisms to ensure a constant developmental timing under  
100 variable temperature conditions.

101 *Drosophila pachea* (Diptera : Drosophilidae) is endemic to the Sonoran desert in  
102 Mexico and is an obligate specialist on decayed parts, or rot-pockets, of its single host plant,  
103 the Senita cactus (*Lophocereus schottii*) (Gibbs et al., 2003; Heed and Kircher, 1965; Lang  
104 et al., 2012; Markow and O'Grady, 2005). The micro-climate of the rot-pockets encompasses  
105 important changes of temperature all along the year, with a recorded maximum variation  
106 from 5°C to 42°C within 24 h (Gibbs et al., 2003). Living in an environment with large daily  
107 and annual temperature changes may require a certain temperature robustness with respect  
108 to developmental processes in poikilotherm species. We wondered if the developmental  
109 timing in *D. pachea* may be sensitive to differing rearing temperatures. To test this, we first  
110 determined the overall timing of the *Drosophila pachea* life-cycle. Then, we focussed on  
111 pupal development at four different rearing temperatures to investigate differences in the  
112 pupal timing. Finally, we compared these durations across closely related sister species  
113 *Drosophila acanthoptera* (Diptera : Drosophilidae) and *Drosophila nannoptera* (Diptera :  
114 Drosophilidae) to investigate potential species-specific developmental timing differences.

115

## 116 **2. Materials and methods**

### 117 **2.1. *Drosophila* stock maintenance**

118 *Drosophila* stocks were retrieved from the San Diego *Drosophila* Species Stock  
119 Center (now The National *Drosophila* Species Stock Center, College of Agriculture and Life  
120 Science, Cornell University, USA). The *D. pachea* stock 15090-1698.01 was established in

121 1997 from individuals caught in Arizona, USA. The *D. nannoptera* stocks 15090-1692.00 and  
122 15090-1693.12 were established in 1992 from individuals caught in Oaxaca, Mexico. The *D.*  
123 *acanthoptera* stock 15090-1693.00 was established in 1976 from individuals caught in  
124 Oaxaca, Mexico (UCSC Drosophila species stock center San Diego, now The National  
125 Drosophila Species stock center, Cornell University). These stocks have been kept in good  
126 conditions at 25°C in our laboratory since 2012.

127 Flies were maintained in transparent plastic vials (25 x 95 mm, Dutscher) containing  
128 about 10 mL of standard Drosophila medium. This medium was composed of 66.6 g/L of  
129 cornmeal, 60 g/L of brewer's yeast, 8.6 g/L of agar, 5 g/L of methyl-4-hydroxybenzoate and  
130 2.5% v/v ethanol (standard food). We added 40 µL of 5 mg/mL of 7-dehydrocholesterol  
131 (7DHC) (Sigma, reference 30800-5G-F) dissolved in ethanol into the food for *D. pachea*, as  
132 this species need this sterol for proper development (Heed and Kircher, 1965; Lang et al.,  
133 2012; Warren et al., 2001) (standard *D. pachea* food). As a pupariation support, a piece of  
134 paper sheet (1 cm x 4 cm, BenchGuard) was added to each vial. Stocks were kept at 25°C  
135 or 29°C at a 12 h light:12 h dark photoperiodic cycle with a 30 min transition between light  
136 (1080 lm) and dark (0 lm).

137

## 138 **2.2. Cohort synchronisation of *D. pachea* embryos and time-lapse recording of** 139 **embryonic development**

140 For collection of cohorts of synchronised embryos, about 250-500 adult flies were  
141 transferred into a 9 x 6 cm plastic cylinder, closed by a net on the top and by a 5.5 cm  
142 diameter petri-dish lid at the bottom. The petri-dish contained grape juice agar (24.0 g/L  
143 agar, 26.4 g/L saccharose, 20% grape juice, 50% distilled water, 12% Tegosept [1.1 g/mL in  
144 ethanol] (Dutscher), 4% 7-DHC (Sigma)) and 50-200 µL fresh baker's yeast as food source  
145 and egg laying substrate on top. These plates are named hereinafter "food plates". Female  
146 flies were let to lay eggs on the food plates for 1 h - 2 h (1 h to examine embryos and 2 h to  
147 synchronise larvae). Then, eggs were retrieved from food plates by filtering the yeast paste  
148 through a 100 µm nylon mesh (BS, Falcon 352360).

149 For time-lapse imaging the chorion of embryos was removed by a 90 sec incubation  
150 of the embryo-containing filter in 1.3% bleach (BEC Javel) under constant agitation until  
151 about half of the embryos were floating at the surface of the bleach bath. Embryos were  
152 extensively rinsed with tap water for at least 30 sec. Dechorionated embryos were then  
153 gently glued on a cover slip (ThermoFisher) coated with Tesa glue. For coating, 50 cm TESA

154 tape was transferred into 25 mL n-heptane (Merck) and glue was let to dissolve overnight at  
155 room temperature. A total of 15  $\mu$ L of dissolved glues was finally pipetted onto a cover slip to  
156 form a 5 x 20 mm rectangular stripe and n-heptane was let to evaporate. Embryos were  
157 covered with 40  $\mu$ L of Voltalef 10S halocarbon oil (VWR) to avoid desiccation. Live-imaging  
158 was immediately launched inside a temperature and humidity controlled chamber at 25°C  $\pm$   
159 0.1°C and 80%  $\pm$  1% humidity (Lang and Orgogozo, 2012; Lefèvre et al., 2021; Rhebergen  
160 et al., 2016). Time-lapse acquisition was performed at an acquisition rate of 1 picture every  
161 7.5 sec using a digital camera (Conrad 9-Megapixel USB digital microscope camera) and  
162 Cheese software, version 3.18.1, on a computer with an ubuntu 16.04 linux operating  
163 system. Movies were assembled with avconv (libav-tools).

164 In *Drosophila melanogaster* and closely related species, females were reported to  
165 hold fertilized eggs inside the reproductive tract for >12 hours (Markow et al., 2009), which  
166 could explain the variation observed in our experiments with *D. pachea*. Therefore, we  
167 monitored egg retention in this species by examining dechorionated eggs from a 1 h egg-  
168 laying period. We found that all observed embryos (n=52) were early embryos at the  
169 syncytial blastoderm stage (Wieschaus and Nüsslein-Volhard, 1986) and egg retention was  
170 not observed. Out of 28 embryos monitored, 12 (43%) pursued their development until  
171 hatching while the others did not develop at all (Movie S1, Dataset S1). Such mortality has  
172 been reported previously (Jefferson, 1977; Pitnick, 1993) but potentially also dependent on  
173 the above-mentioned bleach treatment. The embryos that died during the experiment were  
174 excluded from analysis. Furthermore, the duration of hatching, which is the last stage of  
175 embryonic development, has been shown to be more variable in comparison to the other  
176 embryonic stages in various *Drosophila* species (Chong et al., 2018; Kuntz and Eisen,  
177 2014). We thus measured both the total embryonic duration, from collection up to larva  
178 hatching and the embryonic duration up to the trachea gas filling stage, which precedes the  
179 hatching stage (Dataset S1).

180

### 181 **2.3. Cohort synchronisation of larvae, dissection and imaging of larval mouth hooks**

182 In order to collect cohorts of larvae at a synchronous developmental stage, we first  
183 collected embryos from a 2 h egg laying interval (see above) that were placed on a food  
184 plate together with fresh yeast. Freshly hatched larvae were retrieved from the yeast paste  
185 with fine forceps (Dumont #5, Fine Science Tool) or by filtering the yeast through a nylon  
186 mesh (see above). Larvae were transferred into vials containing standard *Drosophila*  
187 *pachea* food and were examined once a day until all larvae had turned into pupae (Dataset

188 S2).

189 For imaging of the larval teeth, entire larvae were mounted in 20  $\mu$ L dimethyl-  
190 hydantoin formaldehyde (DMHF) medium (Entomopraxis) beneath a cover slip (0.17 mm  $\pm$   
191 0.01 mm thick, ThermoScientific), which was gently pressed against the microscope slide  
192 (ThermoScientific) to orient larval teeth in a flat, lateral orientation to the microscope  
193 objective. Larval teeth were imaged at 100 or 400 fold magnification in bright field  
194 illumination (Strasburger, 1935) using the microscope IX83 (Olympus). The instar stage of  
195 each dissected individual was determined based on tooth morphology (Strasburger, 1935)  
196 (Figure S1).

197

#### 198 **2.4. Measurement of the duration of puparium formation in *D. pachea***

199 The precise duration of puparium formation was characterized by monitoring nine *D.*  
200 *pachea* pupariating larvae by time-lapse imaging. Larvae at the third instar stage and third  
201 instar wandering stage were collected from the *D. pachea* stock and were transferred into  
202 fresh *D. pachea* standard medium, inside a 5 cm diameter petri-dish and a piece of 1 cm x 4  
203 cm paper sheet (BenchGuard). The dish was then placed into the temperature and humidity  
204 controlled chamber at 25°C  $\pm$  0.1°C and 80%  $\pm$  1% humidity, as previously described. Time-  
205 lapse acquisition was performed for about 72 h as previously described for embryonic timing  
206 characterization. The duration of the white puparium stage was measured from the moment  
207 when the larva had everted the anterior spiracles and had stopped moving until the moment  
208 when the pupal case had turned brown.

209

#### 210 **2.5. Characterization of developmental timing in pupae**

211 The developmental duration of *D. pachea*, *D. nanoptera* and *D. acanthoptera* was  
212 examined by observation of pupae at different time points after puparium formation (APF).  
213 Synchronised pupae were obtained from each species by collecting so-called “white pupae”  
214 that had just formed the puparium (Dataset S3). Specimens were collected with a wet brush  
215 directly from stock vials. Individuals of the same cohort were placed onto moist Kimtech  
216 tissue (Kimberly-Clark) inside a 5 cm diameter petri dish. Petri dishes with pupae were kept  
217 at 22°C, 25°C, 29°C, or 32°C inside plastic boxes, which also contained wet tissue paper.  
218 Specimens analyzed at 22°C and 32°C were taken from a stock at 25°C at the stage of  
219 puparium formation and subsequently incubated at the desired temperature. A group of

220 pupae resulting from a single collection event was considered as a synchronised cohort.  
221 Developmental progress of synchronised cohorts (Table 1, Figure S2) was examined at  
222 various time points by visual examination of the pupae using a stereomicroscope VisiScope  
223 SZB 200 (VWR) (Dataset S4). Developmental stages were assigned according to  
224 morphological markers defined for *D. melanogaster* by Bainbridge and Bownes (1981)  
225 (Table 2). The markers used to characterize stages 8 to 12 (eye, wing or body pigmentation,  
226 Table 2) were not convenient for the characterization by direct observation of *D.*  
227 *acanthoptera* pupae as these flies develop black eyes, as opposed to most other Drosophila  
228 species that have red eyes. In addition, *D. acanthoptera* is generally less pigmented  
229 compared to *D. pachea* and *D. nannoptera* (Pitnick and Heed, 1994) and pigmentation  
230 changes were not easily detectable through the pupal case. Therefore, we additionally  
231 carried out time-lapse imaging of one cohort with five *D. acanthoptera* pupae to investigate  
232 the developmental durations of stages 8-12. The anterior part of the pupal case was  
233 removed, letting the head and the anterior part of the thorax visible. Image acquisition was  
234 done at  $25^{\circ}\text{C} \pm 0.1^{\circ}\text{C}$  and  $80\% \pm 1\%$  humidity, as previously described. Time-lapse  
235 acquisition was performed as previously described and recorded with the VLC media player,  
236 version 3.0 at an acquisition rate of 1 picture every 13:02 min. Two pupae died during  
237 acquisition and were excluded from the analysis (Movie S2).

238

## 239 **2.6. Data analysis**

240 Data was manually entered into spreadsheets (Datasets S1, S2, S3 and S4) and  
241 analysis was performed in R version 3.6 (R Core Team, 2014). Ages expressed in hours  
242 after pupa formation were automatically calculated with respect to the time point of white  
243 pupa collection.

244

## 245 **3. Results**

### 246 **3.1. *D. pachea* embryonic and larval development at 25°C last for about 33 h and 216** 247 **h, respectively**

248 We roughly examined the duration of embryonic and larval development in *D.*  
249 *pachea* at 25°C. The average duration of the total embryonic development in *D. pachea* at  
250 25°C, until hatching of the larva was 32 h 48 min  $\pm$  1 h 13 min (mean  $\pm$  standard deviation ; n  
251 = 12) (Figure 1, Movie S1). Embryonic development up to the trachea gas filling stage (see  
252 Material and Methods for details) was estimated to be 26 h 48 min  $\pm$  1 h 13 min (mean  $\pm$



253 standard deviation ; n = 12) (Movie S1). These durations appeared to be longer in *D.*  
254 *pachea* compared to those reported for various other *Drosophila* species, such as  
255 *Drosophila melanogaster*, *Drosophila simulans*, *Drosophila sechellia*, *Drosophila yakuba*,  
256 *Drosophila pseudoobscura*, *Drosophila mojavensis* (Figure 2) (David and Clavel, 1966;  
257 Kuntz and Eisen, 2014; Powsner, 1935).

258 The total duration of *D. pachea* larval development on standard *D. pachea* food at  
259 25°C was approximately 9 days (~216 h). The duration of the first and second instar larva  
260 were about 2 days each and the third instar stage lasted for about 5 days (Figure 1). In *D.*  
261 *melanogaster*, the total duration of the larval stage was about 5 days for larvae reared on  
262 optimal food at 25°C, the first and second instars lasting for 1 day each, and the third instar  
263 for three days, according to Strasburger, (1935). The larval development of *D. pachea*  
264 appeared thus to be longer compared to those of *D. melanogaster* at 25°C.

265

### 266 **3.2. Similar durations of pupal development in *D. pachea* at 25°C, 29°C and 32°C**

267 The duration of larval development appears to be sensitive to various environmental  
268 factors, such as diet (Matzkin et al., 2011), crowding, or access to food (Vijendravarma et al.,  
269 2013). Since pupal development is apparently less affected by such factors, we focussed on  
270 the pupal stage to investigate the effect of the rearing temperature on timing of development  
271 in *D. pachea*. We evaluated pupal developmental progress at four temperatures: 22°C, 25,  
272 29°C, and 32°C. Preliminary tests revealed that rearing of *D. pachea* at temperatures lower  
273 than 25°C is prolonged which favors the accumulation of bacterial infections in the food and  
274 decreased survival of the flies. At 34°C, *D. pachea* individuals died within a few days and at  
275 32°C flies survived but did not reproduce. Since we could not cultivate *D. pachea* at the  
276 extreme temperatures of 22°C and 32°C, individuals were selected at the stage of puparium  
277 formation in a stock at 25°C and incubated at either temperature.

278 At 25°C - 32°C, *D. pachea* pupae reached the pharate adult stage in less than 55 h  
279 but timing was prolonged at 22°C (Figure 3A-E). However, pupal development was  
280 accelerated at 29°C and 32°C between stages 8 and 13 (beginning of eye pigmentation until  
281 the end of body and wing pigmentation) compared to development at 25°C (Figure 3A-E). In  
282 addition, development was consistently slower at 22°C compared to 25°C. However, stages  
283 14 and 15 required more time at 29°C and 32°C with respect to developmental progress at  
284 25°C and resulted in a similar overall duration of about 100 - 145 h. Only at 22°C,  
285 development was globally slower and adults emerged later, between 150 - 190 h. Thus, in

286 *D. pachea* the rearing temperature influences the relative progress of pupal development at  
287 particular stages. While pupal development is slowed-down at temperatures below 25°C, the  
288 overall duration appears to be similar at higher temperatures.

### 289 **3.3. The timing of the pupal development is conserved up to the pharate adult stage** 290 **between *D. pachea* and various *Drosophila* species at 25°C**

291 The white pupa stage (see Material and Methods for details) in *D. pachea* was  
292 estimated to last for 102 min ± 41 min (mean ± standard deviation) (n=9) at 25°C. This  
293 duration has to be considered as the remaining variation of developmental progress between  
294 examined individual pupae in later timing analyses (see Materials and Methods). This  
295 duration was similar to previously reported durations for *D. melanogaster* white pupae of 80-  
296 120 min, at 25°C (Bainbridge and Bownes, 1981).

297 At 25°C, the pharate adult stage (stage 7, Table 2) was observed about 55 h after  
298 puparium formation and emergence of adults between 115 - 145 h after puparium formation  
299 (Figures 2A). This timing was similar to those of *D. acanthoptera* and *D. nannoptera* (Figure  
300 3B). The developmental duration from puparium formation to pharate adult (stages 1 to 7,  
301 from 0 h APF to about 55 h APF) was also similar to those reported for *D. melanogaster* and  
302 *D. guttifera* (Figure 3B) (Bainbridge and Bownes, 1981; Fukutomi et al., 2017). However, at  
303 later pupal development durations of stages were prolonged in *D. pachea*, *D. nannoptera*  
304 and *D. acanthoptera* compared to *D. melanogaster* and *D. guttifera*.

305 The emergence of the adult fly from the pupal case (stage 15) is highly variable  
306 within *D. pachea*, *D. nannoptera* and *D. acanthoptera*. *D. pachea* adults emerge between  
307 115 - 144 h APF, *D. nannoptera* adults between 112 - 140 h APF and *D. acanthoptera*  
308 adults between 102 h - 142 h APF. The variance of this stage was significantly different  
309 between the three species (Levene's test:  $F = 3.4414$ ,  $Df = 2$ ,  $p = 0.03847$ ), the stage 15  
310 being longer in *D. acanthoptera* compared to *D. pachea* and *D. nannoptera* (Figure 3B).

311

## 312 **4. Discussion**

313

### 314 **4.1. A possible temperature-buffering mechanism during pupal development**

315 The trend of a decrease of developmental duration when rearing temperature  
316 increases was not observed in *D. pachea* at high temperatures. Overall, pupal development  
317 duration were similar at 25°C and 32°C, while it was prolonged at 22°C. On the contrary, the  
318 duration of the overall pupal development decreases with increasing rearing temperature in

319 *D. melanogaster* (Ashburner and Thompson Jr, 1978; Powsner, 1935). In addition,  
320 temperature fluctuations during pupal development of *D. melanogaster* are known to either  
321 increase or decrease developmental speed (Ludwig and Cable, 1933; Petavy et al., 2001).  
322 In this species, the first 24 h of pupal development are more sensitive to temperature  
323 changes compared to the rest of the pupal stage (Ludwig and Cable, 1933; Petavy et al.,  
324 2001). While *D. melanogaster* is a cosmopolitan species that lives in a wide climate range  
325 (David and Capy, 1988), *D. pachea* is a desert species endemic of the Sonora (Heed and  
326 Kircher, 1965; Markow and O'Grady, 2005). The mean daily variations of temperature of this  
327 habitat are 18°C - 42°C in spring/summer and 6°C - 32°C in fall/winter (Gibbs et al., 2003).  
328 *D. pachea* is found in the wild throughout the year but undergoes a strong population decline  
329 during August, when the seasonal temperatures are highest (Breitmeyer and Markow, 1998).  
330 However, adult *D. pachea* are particularly resistant to high-temperatures and survive up to  
331 44°C in the wild, while most other *Drosophila* species revealed a decreasing survival already  
332 at 38°C (Stratman and Markow, 1998). Thus, this species may have developed some heat  
333 resistance mechanisms, physiological and/or behavioral, that results in a certain tolerance to  
334 temperature variations and would buffer temperature changes on the developmental  
335 progress. This buffering effect could potentially be important for proper development since  
336 heat stress has been reported to increase developmental instability in various species  
337 (Kristensen et al., 2003; Nishizaki et al., 2015; Polak and Tomkins, 2013). However, the  
338 specific mechanism by which temperature affects developmental stability is not well  
339 understood (Abrieux et al., 2020; Breuker and Brakefield, 2003; Carvalho et al., 2017;  
340 Enriquez et al., 2018). Rearing at a lower temperature (< 25°C) revealed slower  
341 developmental progress, indicating that a potential buffering for colder temperatures does  
342 not exist in *D. pachea*.

343 Alternatively, the observed buffering phenotype may be temperature independent  
344 and could perhaps ensure the emergence of the adult fly at a particular moment of the day,  
345 such as dawn or dusk, when the environmental temperature might be most suitable for the  
346 freshly emerged individual. In the last pupal stage that corresponds to the adult emergence,  
347 we observed timing variation between individuals in *D. pachea* (up to 75 h between  
348 individuals). This variation could potentially depend on individual differences or on  
349 environmental factors that we could not control, such as the light/dark illumination cycle at  
350 the moment of adult emergence. Such circadian regulation of adult emergence has been  
351 observed in various *Drosophila* species (Ashburner et al., 2004; Mark et al., 2021; Powsner,  
352 1935; Soto et al., 2018). However, the important variation in the last pupal stage is also  
353 found among individuals of the same cohort (Dataset S3 and S4). Future monitoring of the  
354 emergence of adults from various cohorts collected at different moments of the day will be  
355 necessary to test this hypothesis. Future investigations will be needed to further characterize

356 the potential temperature buffering effect during *D. pachea* development and to test the  
357 influence of the circadian rhythm in this species. In addition, we must further assess  
358 temperature dependent pupal development in a wider range of species that live in distinct  
359 climate habitats.

360

#### 361 **4.2. Conservation of the overall developmental progress during early pupal stages**

362 The detailed analysis of the timing of pupal stages revealed that the first stages 1 to  
363 7 appear to be rather synchronous among *D. melanogaster* (Bainbridge and Bownes, 1981),  
364 *D. guttifera* (Fukutomi et al., 2017), and the three closely related species *D. pachea*, *D.*  
365 *acanthoptera* and *D. nannoptera*. Later on, pupal development appears to be more variable  
366 between species. This may indicate the existence of some developmental constraints, which  
367 are limitations of phenotypic variability due to inherent properties of the developmental  
368 system (Smith et al., 1985; Wagner, 2014). Such constraints probably act on outgrowth of  
369 adult organs from primordial structures, so-called imaginal discs, that develop throughout  
370 larval stages but undergo extensive tissue growth during pupal development up to the  
371 pharate adult stage. Thereafter, the timing of development seems to be less constrained and  
372 interspecific variations were observed. At least a part of the variation in the pupal  
373 developmental timing could be attributed to the developmental marker used. As the  
374 coloration markers are qualitative, it is hard to define precise limits of each stage (ie. eyes  
375 turn progressively from yellow to red). A solution might be to identify a combination of  
376 multiple markers for each stage or to establish gene expression markers that are known to  
377 account for specific developmental processes, as it has been recently done for eye  
378 development (Escobedo et al., 2021) or male genitalia development (Vincent et al., 2019).

379

#### 380 **4.3. *D. pachea* embryonic and larval developmental durations appear to be longer** 381 **compared to other *Drosophila* species**

382 The embryonic developmental duration at 25°C has been investigated in 11  
383 drosophila species other than *D. pachea* (Chong et al., 2018; Crapse et al., 2021; David and  
384 Clavel, 1966; Kuntz and Eisen, 2014; Powsner, 1935) (Figure 2) and ranged from 16 h in *D.*  
385 *sechellia* to 25 h in *D. virilis* (Chong et al., 2018; Kuntz and Eisen, 2014) (Figure 2), which  
386 appear to be shorter compared to embryonic development of *D. pachea* at the same  
387 temperature. Interspecific variation in the duration of embryonic development might rely on  
388 genetic factors, as closely related species tend to have similar embryonic developmental  
389 durations compared to those of distantly related ones (Figure 2). Overall, sample size was

390 rather low in our experiments and only present a rough approximation of the time range of  
391 *Drosophila* larval and embryonic development at a single temperature. A detailed examination  
392 would be necessary to adequately refine the duration of each developmental stage.

393 Larval development appeared to be longer in *D. pachea* compared to those in *D.*  
394 *melanogaster* (Bakker, 1959; Strasburger, 1935). However, the duration of this  
395 developmental stage has been shown to be highly variable compared to the other life  
396 stages. In particular it has been shown that larvae are very sensitive to food composition and  
397 to crowding that affect food quality and food access (Matzkin et al., 2011; Vijendravarma et  
398 al., 2013). Food quality and food access in turn prolong the larval developmental duration  
399 (Matzkin et al., 2011). This effect of food on developmental duration might also probably  
400 affect embryonic and pupal stages indirectly due to nutrient contribution from the adult and  
401 larval stages. A slower development observed in *D. pachea* raised in the lab might also be  
402 due to variations in the ecdysone metabolism. In insects, ecdysone is first provided to the  
403 embryo as maternal contribution and then directly produced by the individual (Lafont et al.,  
404 2012). However, in *D. pachea* the first metabolic step of the ecdysone biosynthesis is  
405 different compared to other insect species, the conversion of cholesterol into 7-  
406 dehydrocholesterol being abolished (Lang et al., 2012). Instead, *D. pachea* metabolizes  
407 sterols produced by the *Senita* cactus on which they feed, such as lathosterol, and  
408 potentially campestenol and schottenol (Heed and Kircher, 1965), into steroid hormones  
409 differing in their side residues (Lang et al., 2012). Therefore, in the wild, *D. pachea* may  
410 produce different variants of ecdysone that may also differently affect developmental timing  
411 compared to the lab conditions that only provide the single ecdysone precursor 7-  
412 dehydrocholesterol. Thus, it would be interesting to compare developmental durations of *D.*  
413 *pachea* fed with standard *D. pachea* food used in the lab or with their natural host plant, the  
414 *Senita* cactus. In addition, further investigations would be needed to elucidate how  
415 temperature modulates these mechanisms.

416

#### 417 **4.5. Conclusion**

418 We investigated the effect of temperature on developmental speed in *D. pachea*, a  
419 desert species. We characterized the timing of the life-cycle in this species and observed  
420 prolonged developmental durations compared to other *Drosophila* species. The global  
421 developmental duration during metamorphosis is similar at rearing temperatures between  
422 25°C and 32°C although stage specific timing differences were observed. These  
423 observations indicate that *D. pachea* might potentially have evolved mechanisms to buffer  
424 the effect of temperature on developmental speed. Such mechanisms might be of

425 importance to preserve the fitness of individuals exposed to extreme temperatures and  
426 important temperature variations during their development.

427

## 428 **Acknowledgements**

429 We thank all team members of the Evolution and Genetics team, including Jean  
430 David, for stimulating and constructive discussions. We thank Virginie Courtier for comments  
431 on the manuscript and for covering a part of the experimental costs.

432

## 433 **Funding sources**

434 BL was supported by a pre-doctoral fellowship Sorbonne Paris Cité of the Université  
435 Paris 7 Denis Diderot and by a fellowship from the Labex "Who am I?" ["Initiatives  
436 d'excellence", Idex ANR-18-IDEX-0001, ANR1811LABXJ0071]. This work was further  
437 supported by the CNRS, by a grant of the European Research Council under the European  
438 Community's Seventh Framework Program [FP7/2007-2013 Grant Agreement no. 337579]  
439 given to Virginie Courtier-Orgogozo and by a grant of the Agence Nationale pour la  
440 recherche [ANR-20-CE13-0006] given to ML.

441

## 442 **References**

- 443 Abrieux, A., Xue, Y., Cai, Y., Lewald, K.M., Nguyen, H.N., Zhang, Y., Chiu, J.C., 2020. EYES  
444 ABSENT and TIMELESS integrate photoperiodic and temperature cues to regulate  
445 seasonal physiology in *Drosophila*. *Proc. Natl. Acad. Sci.* 117, 15293–15304.  
446 <https://doi.org/10.1073/pnas.2004262117>
- 447 Abril, S., Oliveras, J., Gómez, C., 2010. Effect of temperature on the development and  
448 survival of the Argentine ant, *Linepithema humile*. *J. Insect Sci.* 10.  
449 <https://doi.org/10.1673/031.010.9701>
- 450 Amarasekare, P., Coutinho, R.M., 2014. Effects of temperature on intraspecific competition  
451 in ectotherms. *Am. Nat.* 184, E50–E65.
- 452 Ambros, V., 2011. MicroRNAs and developmental timing. *Curr. Opin. Genet. Dev.* 21, 511–  
453 517.
- 454 Ambros, V., Horvitz, H.R., 1984. Heterochronic mutants of the nematode *Caenorhabditis*  
455 *elegans*. *Science* 226, 409–416.
- 456 Asano, E., Cassill, D.L., 2012. Modeling temperature-mediated fluctuation in colony size in  
457 the fire ant, *Solenopsis invicta*. *J. Theor. Biol.* 305, 70–77.  
458 <https://doi.org/10.1016/j.jtbi.2012.03.011>
- 459 Ashburner, M., Golic, K.G., Hawley, R.S., 2004. *Drosophila: a laboratory handbook*. Cold  
460 spring harbor laboratory press.
- 461 Ashburner, M., Thompson Jr, J.N., 1978. *Laboratory culture of Drosophila*. Genet. Biol.  
462 *Drosoph.*
- 463 Bächli, G., Bernhard, U., Godknecht, A., 2021. TaxoDros [data base].
- 464 Bainbridge, S.P., Bownes, M., 1981. Staging the metamorphosis of *Drosophila*

- 465 melanogaster. *Development* 66, 57–80.
- 466 Bakker, K., 1959. Feeding period, growth, and pupation in larvae of *Drosophila*  
467 melanogaster. *Entomol. Exp. Appl.* 2, 171–186.
- 468 Ballman, E.S., Collins, J.A., Drummond, F.A., 2017. Pupation behavior and predation on  
469 *Drosophila suzukii* (Diptera: Drosophilidae) pupae in Maine wild blueberry fields. *J.*  
470 *Econ. Entomol.* 110, 2308–2317.
- 471 Borne, F., Prigent, S.R., Molet, M., Courtier-Orgogozo, V., 2021. *Drosophila* glue protects  
472 from predation. *Proc. R. Soc. B* 288, 20210088.
- 473 Breitmeyer, C.M., Markow, T.A., 1998. Resource availability and population size in  
474 cactophilic *Drosophila*. *Funct. Ecol.* 12, 14–21. [https://doi.org/10.1046/j.1365-](https://doi.org/10.1046/j.1365-2435.1998.00152.x)  
475 2435.1998.00152.x
- 476 Breuker, C.J., Brakefield, P.M., 2003. Heat shock in the developmentally sensitive period of  
477 butterfly eyespots fails to increase fluctuating asymmetry. *Evol. Dev.* 5, 231–239.
- 478 Carvalho, G.B., Drago, I., Hoxha, S., Yamada, R., Mahneva, O., Bruce, K.D., Obando, A.S.,  
479 Conti, B., Ja, W.W., 2017. The 4E-BP growth pathway regulates the effect of ambient  
480 temperature on *Drosophila* metabolism and lifespan. *Proc. Natl. Acad. Sci.* 114,  
481 9737–9742. <https://doi.org/10.1073/pnas.1618994114>
- 482 Caygill, E.E., Johnston, L.A., 2008. Temporal regulation of metamorphic processes in  
483 *Drosophila* by the *let-7* and miR-125 heterochronic microRNAs. *Curr. Biol.* 18, 943–  
484 950.
- 485 Chong, J., Amourda, C., Saunders, T.E., 2018. Temporal development of *Drosophila*  
486 embryos is highly robust across a wide temperature range. *J. R. Soc. Interface* 15,  
487 20180304.
- 488 Crapse, J., Pappireddi, N., Gupta, M., Shvartsman, S.Y., Wieschaus, E., Wühr, M., 2021.  
489 Evaluating the Arrhenius equation for developmental processes. *Mol. Syst. Biol.* 17,  
490 e9895.
- 491 David, J., Clavel, F., 1966. Essai de définition d'une température optimale pour le  
492 développement de la *Drosophile*. *Comptes-Rendus Hebd. Séances Académie Sci.*  
493 262, 2159.
- 494 David, J.R., Capy, P., 1988. Genetic variation of *Drosophila melanogaster* natural  
495 populations. *Trends Genet.* 4, 106–111.
- 496 Enriquez, T., Renault, D., Charrier, M., Colinet, H., 2018. Cold Acclimation Favors Metabolic  
497 Stability in *Drosophila suzukii*. *Front. Physiol.* 0.  
498 <https://doi.org/10.3389/fphys.2018.01506>
- 499 Escobedo, S.E., Shah, A., Easton, A.N., Hall, H., Weake, V.M., 2021. Characterizing a gene  
500 expression toolkit for eye- and photoreceptor-specific expression in *Drosophila*. *Fly*  
501 (Austin) 15, 73–88. <https://doi.org/10.1080/19336934.2021.1915683>
- 502 Frogner, K.J., 1980. Variable Developmental Period: Intraspecific Competition Models with  
503 Conditional Age-Specific Maturity and Mortality Schedules. *Ecology* 61, 1099–1106.
- 504 Fukutomi, Y., Matsumoto, K., Agata, K., Funayama, N., Koshikawa, S., 2017. Pupal  
505 development and pigmentation process of a polka-dotted fruit fly, *Drosophila guttifera*  
506 (Insecta, Diptera). *Dev. Genes Evol.* 1–10.
- 507 Gibbs, A.G., Perkins, M.C., Markow, T.A., 2003. No place to hide: microclimates of Sonoran  
508 Desert *Drosophila*. *J. Therm. Biol.* 28, 353–362.
- 509 Hazel, J.R., Prosser, C.L., 1974. Molecular mechanisms of temperature compensation in  
510 poikilotherms. *Physiol. Rev.* 54, 620–677.
- 511 Heed, W.B., Kircher, H.W., 1965. Unique sterol in the ecology and nutrition of *Drosophila*  
512 *pachea*. *Science* 149, 758–761.
- 513 Hennessey, M.K., 1997. Predation on wandering larvae and pupae of Caribbean fruit  
514 fly (Diptera: Tephritidae) in guava and carambola grove soils. *J. Agric. Entomol.* 14,  
515 129–138.
- 516 Hrs-Brenko, M., Claus, C., Bubic, S., 1977. Synergistic effects of lead, salinity and  
517 temperature on embryonic development of the mussel *Mytilus galloprovincialis*. *Mar.*  
518 *Biol.* 44, 109–115.
- 519 Ikemoto, T., 2005. Intrinsic optimum temperature for development of insects and mites.

- 520 Environ. Entomol. 34, 1377–1387.
- 521 James, A.C., Partridge, L., 1995. Thermal evolution of rate of larval development in  
522 *Drosophila melanogaster* in laboratory and field populations. *J. Evol. Biol.* 8, 315–  
523 330.
- 524 Jefferson, M.C., 1977. BREEDING BIOLOGY OF DROSOPHILA PACHEA AND ITS  
525 RELATIVES. The University of Arizona.
- 526 Kapun, M., Barrón, M.G., Staubach, F., Obbard, D.J., Wiberg, R.A.W., Vieira, J., Goubert,  
527 C., Rota-Stabelli, O., Kankare, M., Bogaerts-Márquez, M., Haudry, A., Waidele, L.,  
528 Kozeretska, I., Pasyukova, E.G., Loeschcke, V., Pascual, M., Vieira, C.P., Serga, S.,  
529 Montchamp-Moreau, C., Abbott, J., Gibert, P., Porcelli, D., Posnien, N., Sánchez-  
530 Gracia, A., Grath, S., Sucena, É., Bergland, A.O., Guerreiro, M.P.G., Onder, B.S.,  
531 Argyridou, E., Guio, L., Schou, M.F., Deplancke, B., Vieira, C., Ritchie, M.G., Zwaan,  
532 B.J., Tauber, E., Orengo, D.J., Puerma, E., Aguadé, M., Schmidt, P., Parsch, J.,  
533 Betancourt, A.J., Flatt, T., González, J., 2020. Genomic Analysis of European  
534 *Drosophila melanogaster* Populations Reveals Longitudinal Structure, Continent-  
535 Wide Selection, and Previously Unknown DNA Viruses. *Mol. Biol. Evol.* 37, 2661–  
536 2678. <https://doi.org/10.1093/molbev/msaa120>
- 537 Kristensen, T.N., Pertoldi, \* Cino, Andersen, D.H., Loeschcke, V., 2003. The use of  
538 fluctuating asymmetry and phenotypic variability as indicators of developmental  
539 instability: a test of a new method employing clonal organisms and high temperature  
540 stress. *Evol. Ecol. Res.* 5, 53–68.
- 541 Kuntz, S.G., Eisen, M.B., 2014. *Drosophila* Embryogenesis Scales Uniformly across  
542 Temperature in Developmentally Diverse Species. *PLoS Genet.* 10, e1004293.  
543 <https://doi.org/10.1371/journal.pgen.1004293>
- 544 Lafont, R., Dauphin-Villemant, C., Warren, J.T., Rees, H., 2012. 4 - Ecdysteroid Chemistry  
545 and Biochemistry, in: Gilbert, L.I. (Ed.), *Insect Endocrinology*. Academic Press, San  
546 Diego, pp. 106–176. <https://doi.org/10.1016/B978-0-12-384749-2.10004-4>
- 547 Lang, M., Murat, S., Clark, A.G., Gouppil, G., Blais, C., Matzkin, L.M., Guittard, É.,  
548 Yoshiyama-Yanagawa, T., Kataoka, H., Niwa, R., Lafont, R., Dauphin-Villemant, C.,  
549 Orgogozo, V., 2012. Mutations in the neverland Gene Turned *Drosophila pachea* into  
550 an Obligate Specialist Species. *Science* 337, 1658–1661.  
551 <https://doi.org/10.1126/science.1224829>
- 552 Lang, M., Orgogozo, V., 2012. Distinct copulation positions in *Drosophila pachea* males with  
553 symmetric or asymmetric external genitalia. *Contrib. Zool.* 81.
- 554 Lefèvre, B.M., Catté, D., Courtier-Orgogozo, V., Lang, M., 2021. Male genital lobe  
555 morphology affects the chance to copulate in *Drosophila pachea*. *BMC Ecol. Evol.*  
556 21, 1–13.
- 557 Li, H., Stephan, W., 2006. Inferring the Demographic History and Rate of Adaptive  
558 Substitution in *Drosophila*. *PLOS Genet.* 2, e166.  
559 <https://doi.org/10.1371/journal.pgen.0020166>
- 560 Ludwig, D., Cable, R.M., 1933. The effect of alternating temperatures on the pupal  
561 development of *Drosophila melanogaster* Meigen. *Physiol. Zool.* 6, 493–508.
- 562 Manoj Nair, R., Appukuttan, K.K., 2003. Effect of temperature on the development, growth,  
563 survival and settlement of green mussel *Perna viridis* (Linnaeus, 1758). *Aquac. Res.*  
564 34, 1037–1045.
- 565 Mansourian, S., Enjin, A., Jirle, E.V., Ramesh, V., Rehmann, G., Becher, P.G., Pool, J.E.,  
566 Stensmyr, M.C., 2018. Wild African *Drosophila melanogaster* Are Seasonal  
567 Specialists on Marula Fruit. *Curr. Biol.* 28, 3960–3968.e3.  
568 <https://doi.org/10.1016/j.cub.2018.10.033>
- 569 Mark, B., Bustos-González, L., Cascallares, G., Conejera, F., Ewer, J., 2021. The circadian  
570 clock gates *Drosophila* adult emergence by controlling the timecourse of  
571 metamorphosis. *Proc. Natl. Acad. Sci.* 118.
- 572 Markow, T.A., Beall, S., Matzkin, L.M., 2009. Egg size, embryonic development time and  
573 ovoviviparity in *Drosophila* species: Ovoviviparity in *Drosophila* species. *J. Evol. Biol.*  
574 22, 430–434. <https://doi.org/10.1111/j.1420-9101.2008.01649.x>



- 575 Markow, T.A., O'Grady, P., 2008. Reproductive ecology of *Drosophila*. *Funct. Ecol.* 22, 747–  
576 759. <https://doi.org/10.1111/j.1365-2435.2008.01457.x>
- 577 Markow, T.A., O'Grady, P., 2005. *Drosophila: a guide to species identification and use*.  
578 Elsevier.
- 579 Matzkin, L.M., Johnson, S., Paight, C., Bozinovic, G., Markow, T.A., 2011. Dietary Protein  
580 and Sugar Differentially Affect Development and Metabolic Pools in Ecologically  
581 Diverse *Drosophila*. *J. Nutr.* 141, 1127–1133. <https://doi.org/10.3945/jn.111.138438>
- 582 Nishizaki, M.T., Barron, S., Carew, E., 2015. Thermal stress increases fluctuating  
583 asymmetry in marine mussels: environmental variation and developmental instability.  
584 *Ecosphere* 6, art85. <https://doi.org/10.1890/ES14-00399.1>
- 585 O'Grady, P.M., DeSalle, R., 2018. Phylogeny of the genus *Drosophila*. *Genetics* 209, 1–25.
- 586 Ouchi, Y., Yamamoto, J., Iwamoto, T., 2014. The heterochronic genes *lin-28a* and *lin-28b*  
587 play an essential and evolutionarily conserved role in early zebrafish development.  
588 *PLoS One* 9, e88086.
- 589 Palmer, A.R., 1994. Fluctuating asymmetry analyses: a primer, in: *Developmental Instability:  
590 Its Origins and Evolutionary Implications*. Springer, pp. 335–364.
- 591 Pechenik, J.A., Eyster, L.S., Widdows, J., Bayne, B.L., 1990. The influence of food  
592 concentration and temperature on growth and morphological differentiation of blue  
593 mussel *Mytilus edulis* L. larvae. *J. Exp. Mar. Biol. Ecol.* 136, 47–64.
- 594 Petavy, G., David, J.R., Gibert, P., Moreteau, B., 2001. Viability and rate of development at  
595 different temperatures in *Drosophila*: a comparison of constant and alternating  
596 thermal regimes. *J. Therm. Biol.* 26, 29–39. [https://doi.org/10.1016/S0306-4565\(00\)00022-X](https://doi.org/10.1016/S0306-4565(00)00022-X)
- 597
- 598 Pitnick, S., 1993. Operational sex ratios and sperm limitation in populations of *Drosophila*  
599 *pachea*. *Behav. Ecol. Sociobiol.* 33. <https://doi.org/10.1007/BF00170253>
- 600 Pitnick, S., Heed, W.B., 1994. New species of cactus-breeding *Drosophila* (Diptera:  
601 *Drosophilidae*) in the nanoptera species group. *Ann. Entomol. Soc. Am.* 87, 307–  
602 310.
- 603 Polak, M., Tomkins, J.L., 2013. Developmental selection against developmental instability: a  
604 direct demonstration. *Biol. Lett.* 9, 20121081. <https://doi.org/10.1098/rsbl.2012.1081>
- 605 Porter, S.D., 1988. Impact of temperature on colony growth and developmental rates of the  
606 ant, *Solenopsis invicta*. *J. Insect Physiol.* 34, 1127–1133.  
607 [https://doi.org/10.1016/0022-1910\(88\)90215-6](https://doi.org/10.1016/0022-1910(88)90215-6)
- 608 Powsner, L., 1935. The effects of temperature on the durations of the developmental stages  
609 of *Drosophila melanogaster*. *Physiol. Zool.* 8, 474–520.
- 610 Precht, H., Christophersen, J., Hensel, H., Larcher, W., 1973. Homeothermy and  
611 Poikilothermy, in: *Temperature and Life*. Springer, pp. 505–508.
- 612 Rhebergen, F.T., Courtier-Orgogozo, V., Dumont, J., Schilthuizen, M., Lang, M., 2016.  
613 *Drosophila pachea* asymmetric lobes are part of a grasping device and stabilize one-  
614 sided mating. *BMC Evol. Biol.* 16, 176.
- 615 Riddiford, L.M., 1994. Cellular and molecular actions of juvenile hormone I. General  
616 considerations and premetamorphic actions. *Adv. Insect Physiol.* 24, 213–274.
- 617 Riddiford, L.M., Ashburner, M., 1991. Effects of juvenile hormone mimics on larval  
618 development and metamorphosis of *Drosophila melanogaster*. *Gen. Comp.  
619 Endocrinol.* 82, 172–183.
- 620 Schoolfield, R.M., Sharpe, P.J.H., Magnuson, C.E., 1981. Non-linear regression of biological  
621 temperature-dependent rate models based on absolute reaction-rate theory. *J.  
622 Theor. Biol.* 88, 719–731.
- 623 Sharpe, P.J., DeMichele, D.W., 1977. Reaction kinetics of poikilotherm development. *J.  
624 Theor. Biol.* 64, 649–670.
- 625 Smith, J.M., Burian, R., Kauffman, S., Alberch, P., Campbell, J., Goodwin, B., Lande, R.,  
626 Raup, D., Wolpert, L., 1985. Developmental constraints and evolution: a perspective  
627 from the Mountain Lake conference on development and evolution. *Q. Rev. Biol.* 60,  
628 265–287.
- 629 Soto, E.M., Padró, J., Carmona, P.M., Tuero, D.T., Carreira, V.P., Soto, I.M., 2018. Pupal

630 emergence pattern in cactophilic *Drosophila* and the effect of host plants. *Insect Sci.*  
631 25, 1108–1118. <https://doi.org/10.1111/1744-7917.12484>

632 Strasburger, E.H., 1935. *Drosophila melanogaster* meig. Springer.

633 Stratman, R., Markow, T.A., 1998. Resistance to thermal stress in desert *Drosophila*. *Funct.*  
634 *Ecol.* 12, 965–970.

635 Team, R.C., 2014. R: A language and environment for statistical computing. R Foundation  
636 for Statistical Computing, Vienna, Austria. 2013.

637 Thomas, D.B., 1993. Survivorship of the Pupal Stages of the Mexican Fruit Fly *Anastrepha*  
638 *ludens* (Loew) (Diptera: Tephritidae) in an Agricultural and a Nonagricultural  
639 Situation. *J. Entomol. Sci.* 28, 350–362. <https://doi.org/10.18474/0749-8004-28.4.350>

640 Urbaneja, A., Marí, F.G., Tortosa, D., Navarro, C., Vanaclocha, P., Bagues, L., Castañera,  
641 P., 2006. Influence of Ground Predators on the Survival of the Mediterranean Fruit  
642 Fly Pupae, *Ceratitis capitata*, in Spanish Citrus Orchards. *Biocontrol* 51, 611–626.  
643 <https://doi.org/10.1007/s10526-005-2938-6>

644 Vélez, A., Epifanio, C.E., 1981. Effects of temperature and ration on gametogenesis and  
645 growth in the tropical mussel *Perna perna* (L.). *Aquaculture* 22, 21–26.

646 Vijendravarma, R.K., Narasimha, S., Kawecki, T.J., 2013. Predatory cannibalism in  
647 *Drosophila melanogaster* larvae. *Nat. Commun.* 4, 1789.  
648 <https://doi.org/10.1038/ncomms2744>

649 Vincent, B.J., Rice, G.R., Wong, G.M., Glassford, W.J., Downs, K.I., Shastay, J.L., Charles-  
650 Obi, K., Natarajan, M., Gogol, M., Zeitlinger, J., 2019. An atlas of transcription factors  
651 expressed in male pupal terminalia of *Drosophila melanogaster*. *G3 Genes Genomes*  
652 *Genet.* 9, 3961–3972.

653 Wagner, G.P., 2014. Homology, genes, and evolutionary innovation. princeton university  
654 press.

655 Warren, J.T., Wismar, J., Subrahmanyam, B., Gilbert, L.I., 2001. Woc (without children)  
656 gene control of ecdysone biosynthesis in *Drosophila melanogaster*. *Mol. Cell.*  
657 *Endocrinol.* 181, 1–14.

658 Wieschaus, E., Nüsslein-Volhard, C., Looking at embryos. In *Drosophila: a Practical*  
659 *Approach*, ed. D. B. Roberts (Oxford, UK: IRL Press, 1986) pp. 199–226.

660 Zakharov, V., M., 1992. Population phenogenetics: Analysis of developmental stability in  
661 natural populations. *Acta Zool Fenn* 191.

662

663

664 **Tables**

665 **Table 1: Total numbers of pupae and synchronised cohorts used in for pupal timing**  
 666 **characterization**

| Species                | Temperature (°C) | Total number of pupae | Total number of synchronised cohorts |
|------------------------|------------------|-----------------------|--------------------------------------|
| <i>D. pachea</i>       | 22               | 134                   | 21                                   |
|                        | 25               | 76                    | 11                                   |
|                        | 29               | 42                    | 5                                    |
|                        | 32               | 141                   | 21                                   |
| <i>D. nannoptera</i>   | 25               | 40                    | 13                                   |
| <i>D. acanthoptera</i> | 25               | 61                    | 7                                    |

667

668 **Table 2: Summary of morphological markers used to stage pupae, according to**  
 669 **Bainbridges and Bownes (1981)**

| Pupal stage | Description                                                                            |
|-------------|----------------------------------------------------------------------------------------|
| 1           | Pupariation: extremity of trachea are everted, pupa does not move anymore.             |
| 2           | Clear, white pupa.                                                                     |
| 3           | Light pigmentation, dorsal trachea still visible.                                      |
| 4           | Bubbles appear, dorsal trachea is not visible anymore, light pigmentation of the body. |
| 5           | Cranial extremity is retracted, distal extremity of wings appeared.                    |
| 6           | Yellow body is visible.                                                                |
| 7           | Pharate adult, eyes are not yet pigmented.                                             |
| 8           | Eye discs become a bit yellower compared to the rest of the body.                      |
| 9           | Orange eyes, transparent wings are visible.                                            |
| 10          | Deep red eyes.                                                                         |
| 11          | Bristles are visible on the thorax.                                                    |
| 12          | Wings are clear grey, clear pigmentation of the body.                                  |
| 13          | Wings are completely black, grey pigmentation appears on the body.                     |

|    |                                                                              |
|----|------------------------------------------------------------------------------|
| 14 | Meconium appeared under the form of a dark spot visible through the abdomen. |
| 15 | Eclosion of the adult.                                                       |

670

## 671 **Figures**

672

673

### 674 **Figure 1: Timing of the embryonic and larval stages in *D. pachea* at 25°C.**

675 Embryo duration represents the time from egg laying to the hatching of the larva, based on  
676 time-lapse imaging (dotted line). Larval stages were determined based on mouth hook  
677 morphology of dissected larvae from synchronized cohorts, according to Strasburger (1935).  
678 Black dots indicate single observations (Dataset S2). Numbers correspond to the number of  
679 individuals observed at each stage.

680

### 681 **Figure 2: Durations of the embryonic development in various *Drosophila* species at 682 25°C.**

683 The duration of total embryonic development of *D. pachea* (grey) was established based on  
684 time-lapse imaging. The data for the species other than *D. pachea* were extracted from:  
685 blue: Kuntz and Eisen, 2014 (duration up to the trachea filling stage, at 25°C), yellow: David  
686 and Clavel, 1966 (total embryonic development, at 25°C) and green: Powsner, 1935 (total  
687 embryonic development, at 25°C). The data used to establish the cladogram was extracted  
688 from Yassin (2013) and Lang et al. (2014).

689

### 690 **Figure 3: Progress of pupal development.**

691 A-D: Durations of developmental stages in *D. pachea* pupae at 22°C (A), 25°C (B), 29°C (C)  
692 and 32°C (D), observed at various time points. Temperatures are highlighted in blue colour  
693 tones according to the legend. Black dots indicate single observations (Dataset S3). E:  
694 Overlay of durations from panels A - D. F: Comparison of pupal development at 25°C in *D.*  
695 *pachea* (blue), *D. acanthoptera* (green) and *D. nannopectera* (yellow) based on observations  
696 of synchronized cohorts. The stages 8 to 12 were determined in *D. acanthoptera* by time-  
697 lapse imaging of developing pupae, after removal of the anterior part of the pupal case  
698 (dotted lines). Data of *D. melanogaster* (pink) and *D. guttifera* (purple) were retrieved from  
699 Bainbridge and Bownes (1981) and Fukutomi et al. (2017), respectively. These species were  
700 indicated by stars in the legend.

701

702

703

704 **Supplementary data**

705

706 **Figure S1: Mouth hook morphology at the three different larval instar.**

707 Larval mouth hook from A: first, B: second and C: third larval instar in *Drosophila pachea*.

708 The scale bar is 10  $\mu$ m.

709

710 **Figure S2: Pupal stages in *D. pachea*.**

711 Pupal stages of *D. pachea*, based on the characterization of *D. melanogaster* by Bainbridge  
712 and Bones (1983) (Table 2). Pupae of each stage are presented in dorsal (D) and ventral (V)

713 view. The stage (Table 2) is indicated by a number. Arrows point to relevant morphological

714 markers: C: stage 3, dorsal trachea still visible; D: stage 4, bubbles appear and trachea not

715 visible; E: stage 5, distal margins of wings appear; F: stage 6, yellow body visible; G: stage

716 7, non-pigmented eyes visible; H: stage 8, yellow eyes appear; I: stage 9, orange eyes; J:

717 stage 10, red eyes; K: stage 11, thorax bristles visible; L: stage 12, grey wings; M: stage 13,

718 black wings; N: stage 14, meconium visible. The scale is 100  $\mu$ m.

719

720 **Movie S1: Time-lapse of embryonic development of *D. pachea* at 25 °C.**

721 Out of the 28 embryos, 12 completed their development up to the larva hatching. The 16  
722 embryos that did not complete their embryonic development were excluded from the  
723 analysis.

724

725 **Movie S2: Time-lapse of pupal development of *D. acanthoptera* from 52 h APF up to  
726 the emergence of the adult at 25°C**

727 Out of 5 pupae, 3 completed their development up to adult emergence. The two that died  
728 during the time-lapse were excluded from analysis.

729

730 **Dataset S1: Observations of embryonic development in *D. pachea* at 25°C**

731

732 **Dataset S2: Observations of larval development in *D. pachea* at 25°C**

733

734 **Dataset S3: Pupae cohorts for developmental timing characterization**

735

736 **Dataset S4: Observations of pupal development in *D. pachea*, *D. acanthoptera* and *D.*  
*nannotpera***

737

738 **Availability of data and material**

739 The movies S1 and S2 supporting the results of this article are available in the DRYAD

740 repository,

741 [https://datadryad.org/stash/share/dfhCAtgopC4JY6qmkjK6Q\\_UEMmf2WSfc1gdETPPI7gk](https://datadryad.org/stash/share/dfhCAtgopC4JY6qmkjK6Q_UEMmf2WSfc1gdETPPI7gk).

742

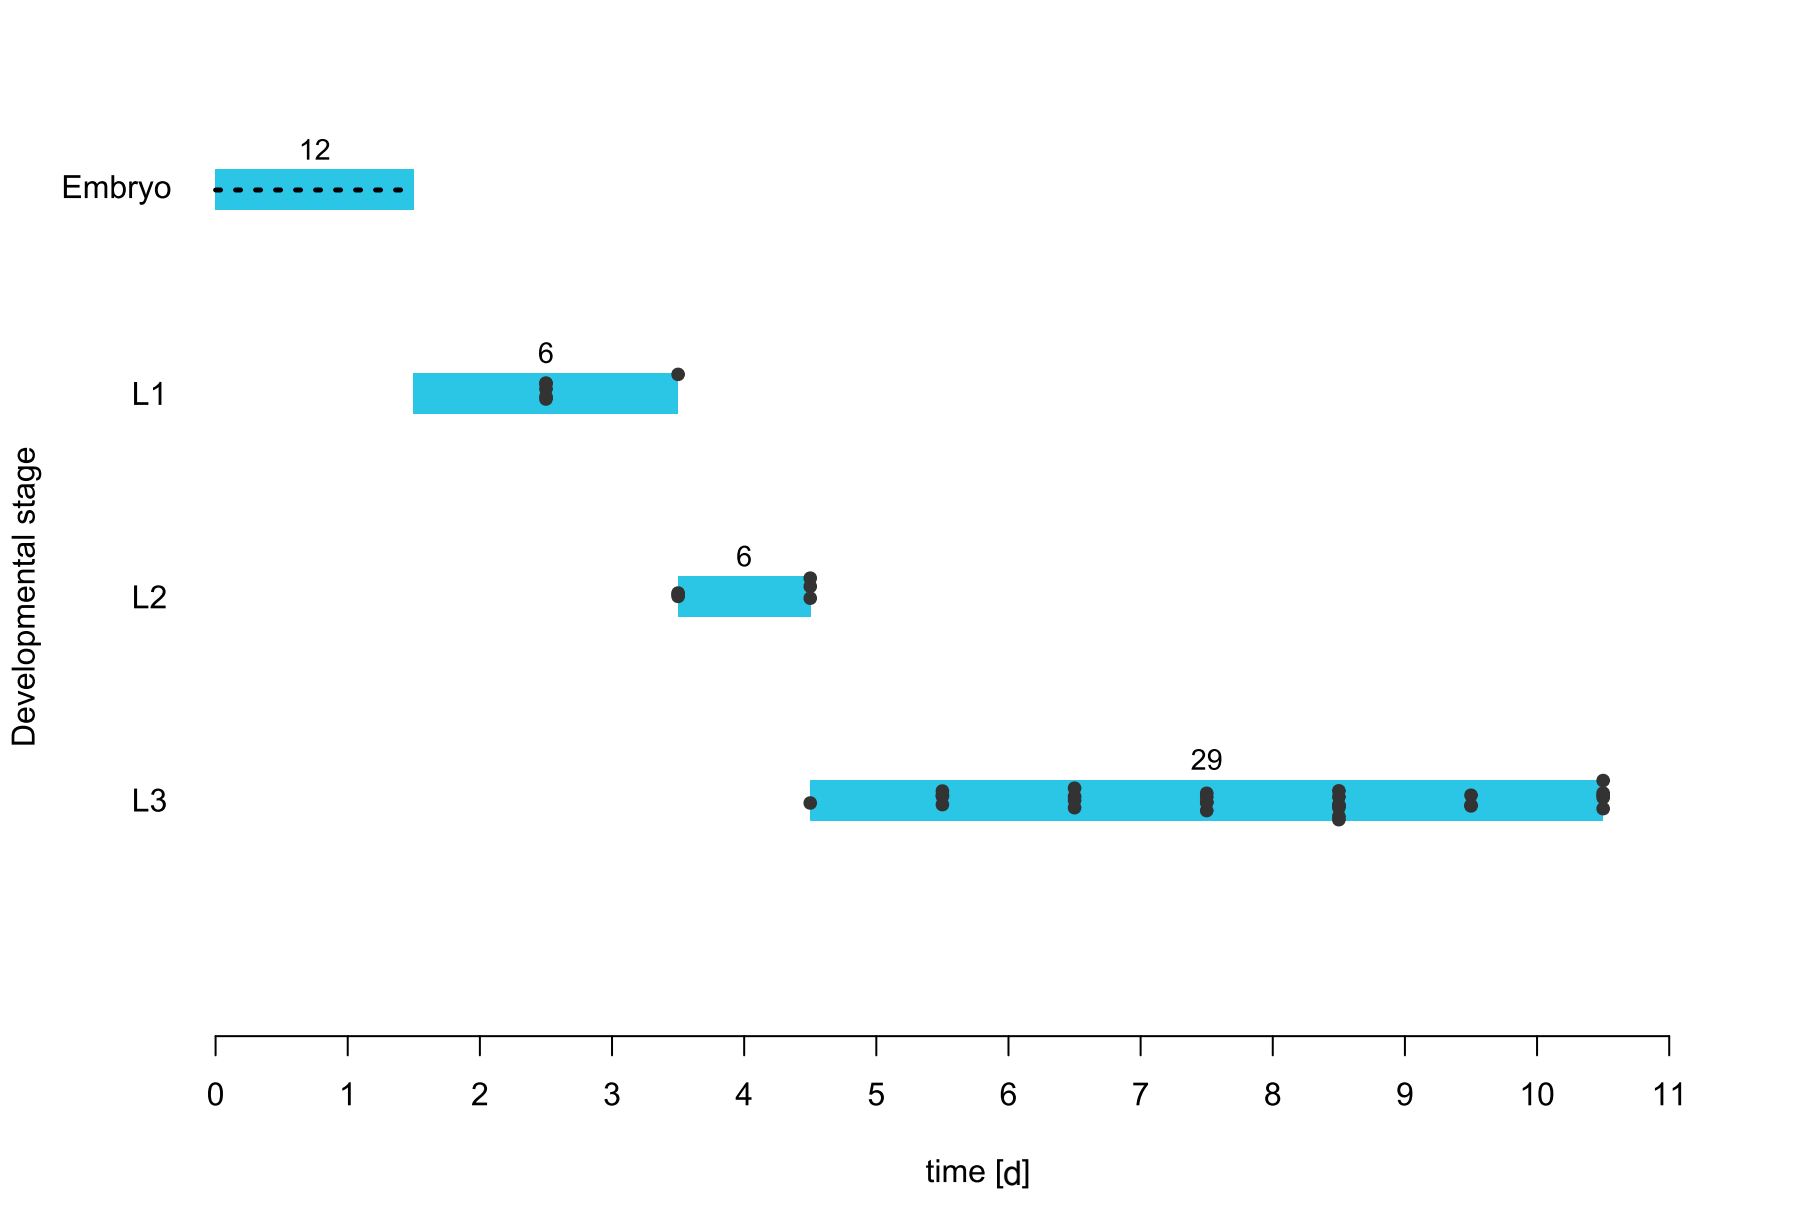

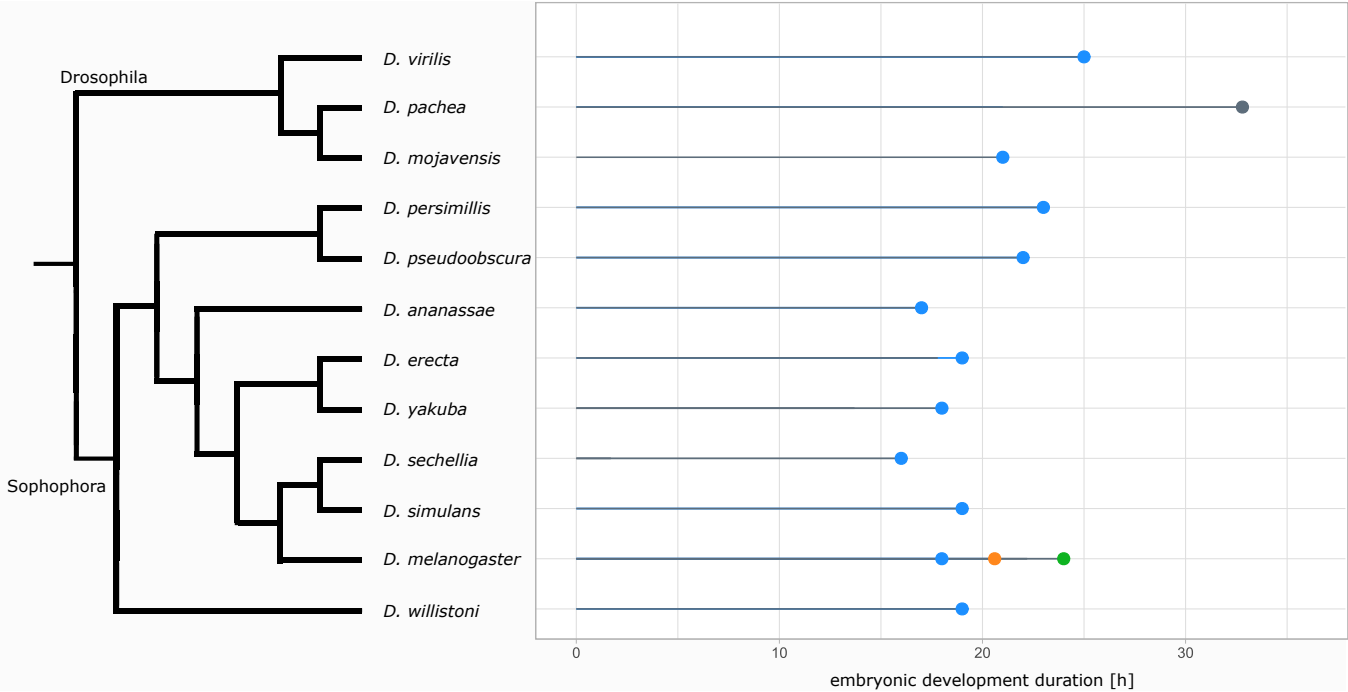

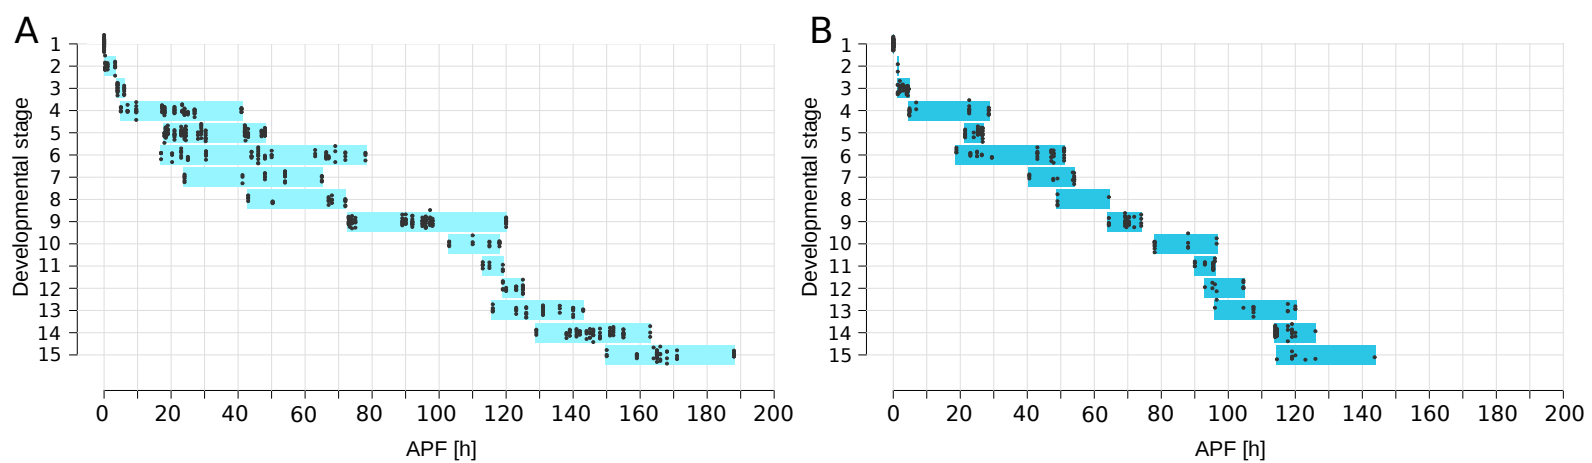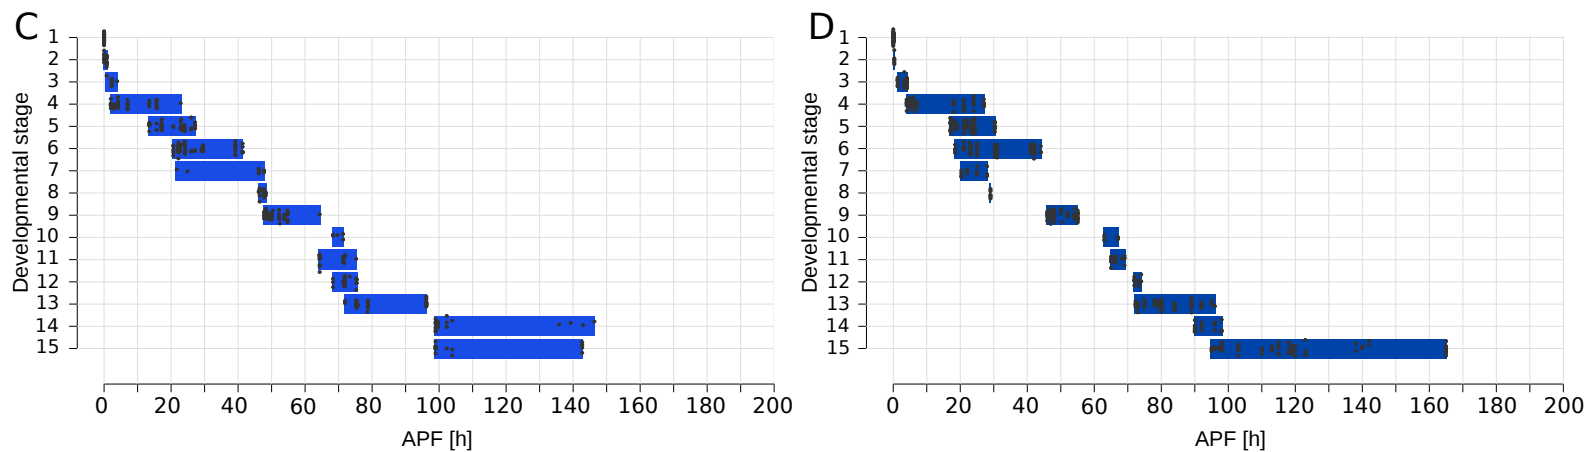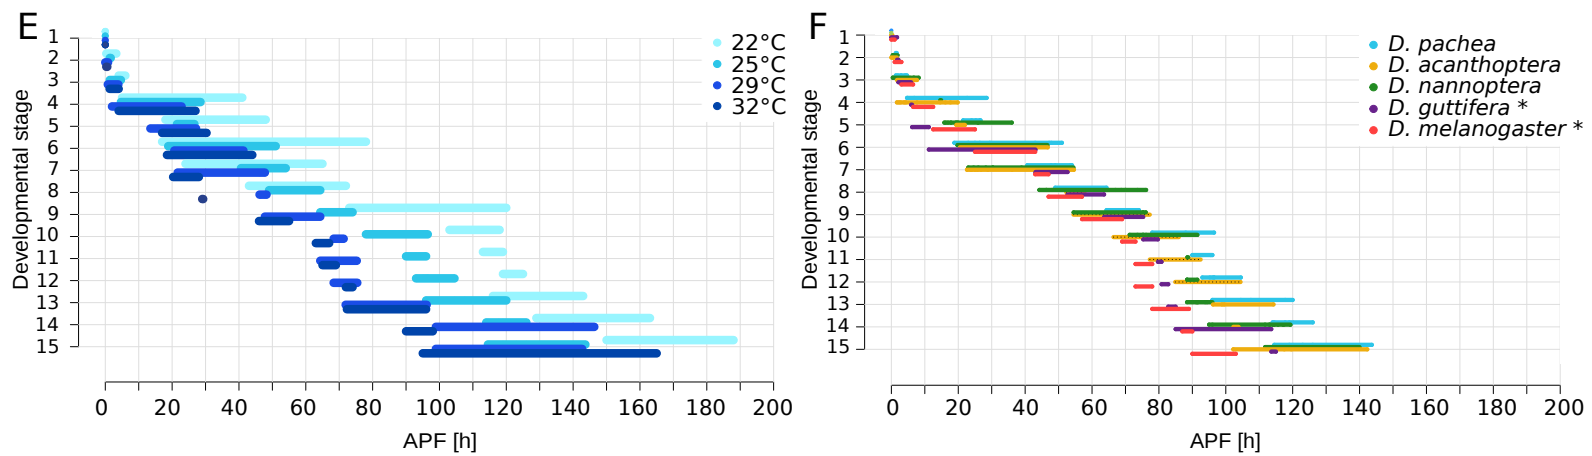

Source: https://www.biorxiv.org/content/10.1101/2021.08.25.457619v2.full.pdf
